# Supplementary material for: Transient light-activated gene expression in Chinese hamster ovary cells
Source: PubMed Central journal article supplement (PMC7863527; doi:10.1186/s12896-021-00670-1), 2021-02-04
Supplement: 12896_2021_670_MOESM1_ESM.pdf [file 12896_2021_670_MOESM1_ESM.pdf]

# Transient light-activated gene expression in Chinese hamster ovary cells

Shiaki A. Minami<sup>a</sup> and Priya S. Shah<sup>a,b,\*</sup>

<sup>a</sup> Department of Chemical Engineering

<sup>b</sup> Department of Microbiology and Molecular Genetics

University of California, Davis

\* Correspondence: [prsshah@ucdavis.edu](mailto:prsshah@ucdavis.edu), @shah\_ps

## Supplementary Information

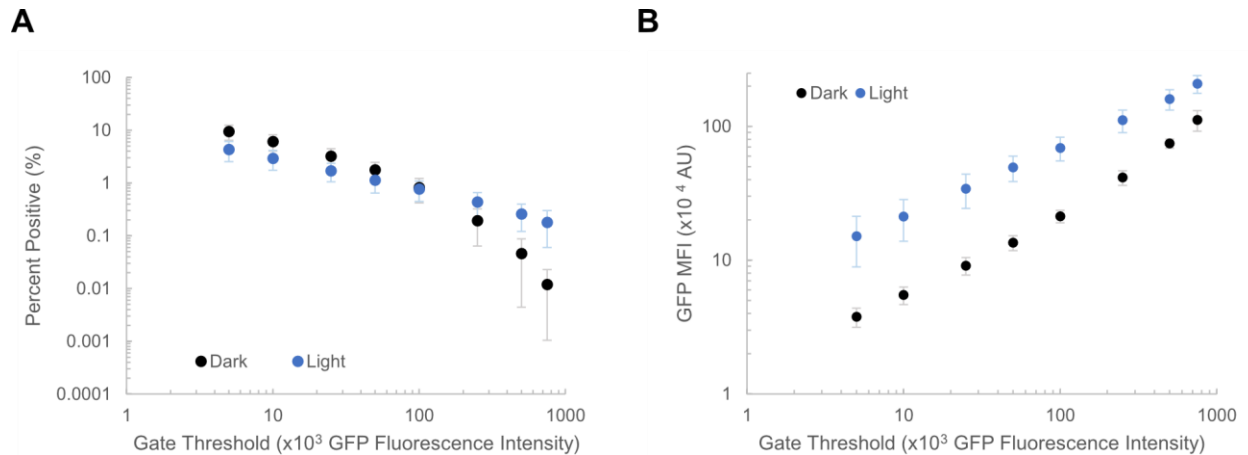

**Figure S1. Percent positive cells and MFI plotted against gate threshold. (A)** Number of cells crossing the eGFP-positive gate with increasing gate threshold. At high gate thresholds, the number of eGFP-positive cells are higher for the activated LACE system. At lower gate thresholds, the number of eGFP-positive cells are higher for the nonactivated LACE system. **(B)** GFP MFI of LACE cells plotted against gate thresholds. eGFP-positive cells are higher for the LACE system in the light for all gate thresholds.

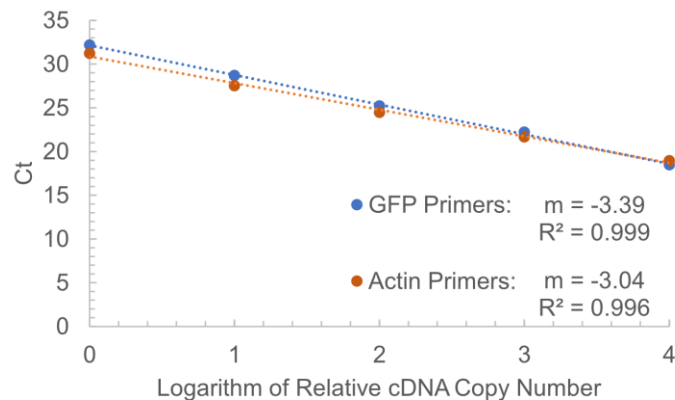

**Figure S2. qRT-PCR primer efficiencies.** Primer efficiencies for eGFP and Actin. eGFP and Actin primer efficiencies calculated from the slopes ( $m$ ) of the  $\log(\text{cDNA})$  plots are 97.2% and 113%, respectively. Data are averaged from duplicate dilutions.

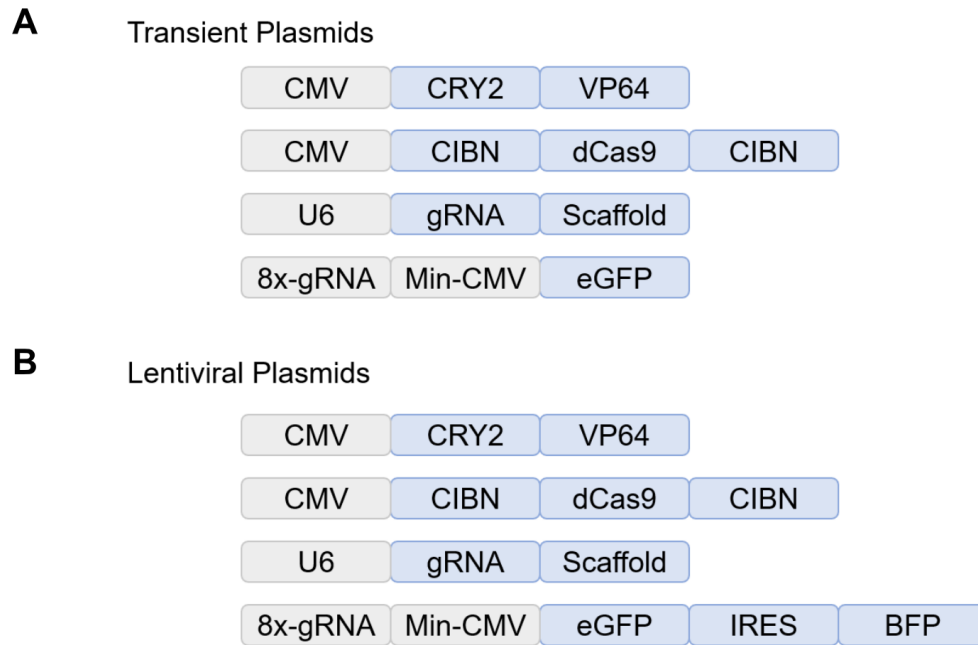

**Figure S3. Transient and lentiviral expression constructs. (A)** Transient plasmid expression constructs. CRY2 and CIBN are expressed by CMV promoters, gRNA is expressed by a U6 promoter, and GFP is expressed by a minimal CMV promoter, whose expression is activated by VP64. **(B)** Lentiviral expression constructs. All constructs except the minimal CMV construct are identical to the transient plasmids **(A)**, except in a lentiviral backbone. The minimal CMV construct was modified to contain an additional IRES sequence and BFP to identify light-activated cells once the GFP is removed.
